# Supplementary material for: miR-22 has a potent anti-tumour role with therapeutic potential in acute myeloid leukaemia
Source: PubMed Central journal article supplement (PMC5477496; doi:10.1038/ncomms11452), 2016-04-26
Supplement: ncomms11452-s1.pdf [file ncomms11452-s1.pdf]

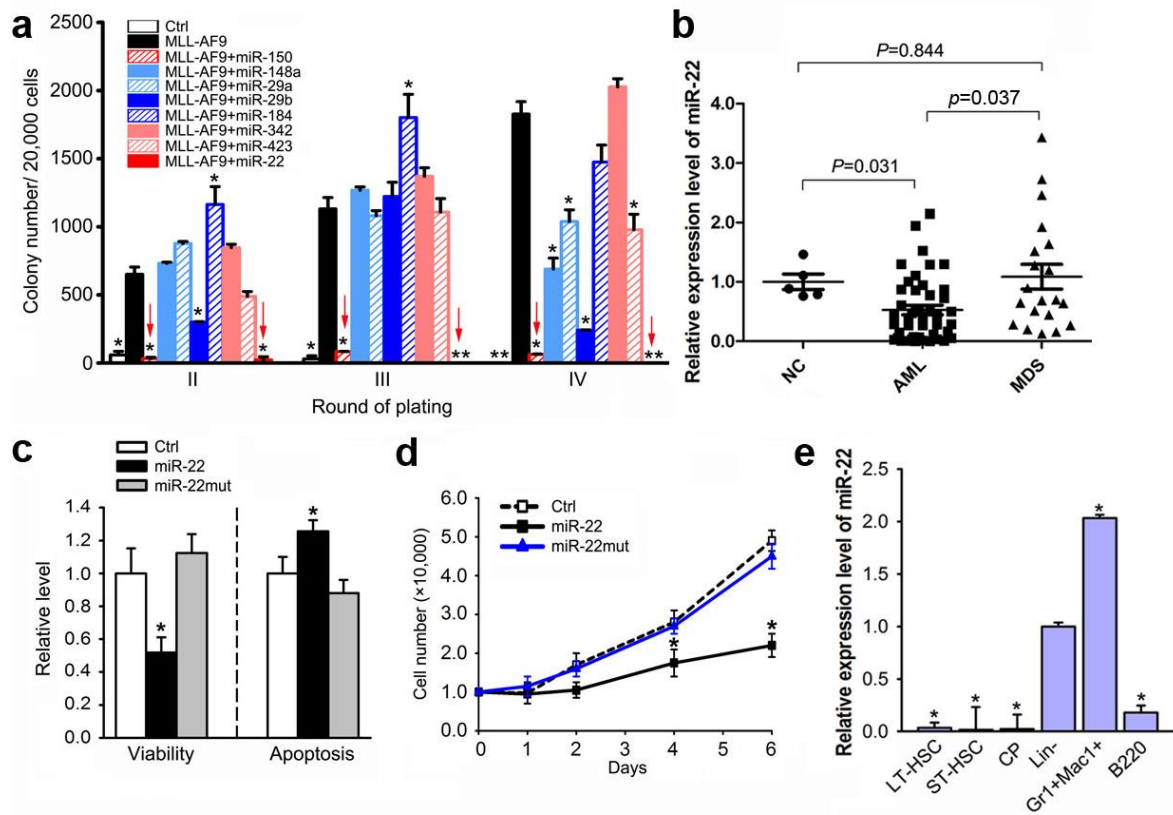

**Supplementary Figure 1.** miR-22, which is down-regulated in AML, inhibits AML cell transformation and growth. **(a)** Comparison of effects of a set of miRNAs, which are down-regulated in AML, on *MLL-AF9*-induced colony forming. Colony-forming/replating assays (CFAs) were performed using mouse BM progenitor (lineage negative; Lin<sup>-</sup>) cells transduced with retrovirus of MSCV-neo+MSCV-PIG (Ctrl), MSCV-neo-*MLL-AF9*+MSCV-PIG (*MLL-AF9*), or MSCV-neo-*MLL-AF9*+MSCV-PIG-miR-150/miR-148a/miR-29a/miR-29b/miR-184/miR-342/miR-423/miR-22. **(b)** qPCR confirmation of the down-regulation of miR-22 in AML. Expression level of miR-22 in the mononuclear cells of 5 normal MNC control (NC), 42 AML (including 17 *MLL*-rearranged AML, 13 t(8;21), 5 t(15;17) and 7 inv(16)) and 20 MDS (including 17 (+8) and 3 (-7)) samples are shown. **(c, d)** Effects of miR-22 on the viability and apoptosis **(c)** as well as growth **(d)** of AML cells. MONOMAC-6 cells were transfected with MSCV-PIG (Ctrl), MSCV-PIG-miR-22 (miR-22), or miR-22 mutant (miR-22mut) plasmids. Cell viability and apoptosis were detected 48 hrs post-transfection. Cell growth was assessed by cell counts at a series of time points post-transfection. **(e)** Expression levels of miR-22 in various sub-populations of mouse normal hematopoietic cells. Expression levels of miR-22 in long-term HSC (LT-HSC; Lin<sup>-</sup>Sca1<sup>+</sup>c-Kit<sup>+</sup>Flk2<sup>-</sup>, LSKF<sup>-</sup>), short-term HSC (ST-HSC; Lin<sup>-</sup>Sca1<sup>+</sup>c-Kit<sup>+</sup>Flk2<sup>+</sup>, LSKF<sup>+</sup>), committed progenitor (CP; Lin<sup>-</sup>Sca1<sup>-</sup>c-Kit<sup>+</sup>), Gr-1<sup>+</sup>/Mac-1<sup>+</sup> myeloid and B220<sup>+</sup> lymphoid cells, were normalized to the level in lineage negative (Lin<sup>-</sup>) cells. Mean±SD values are shown. \*,  $p < 0.05$ . All the  $p$  values shown in this figure were generated by  $t$ -test.

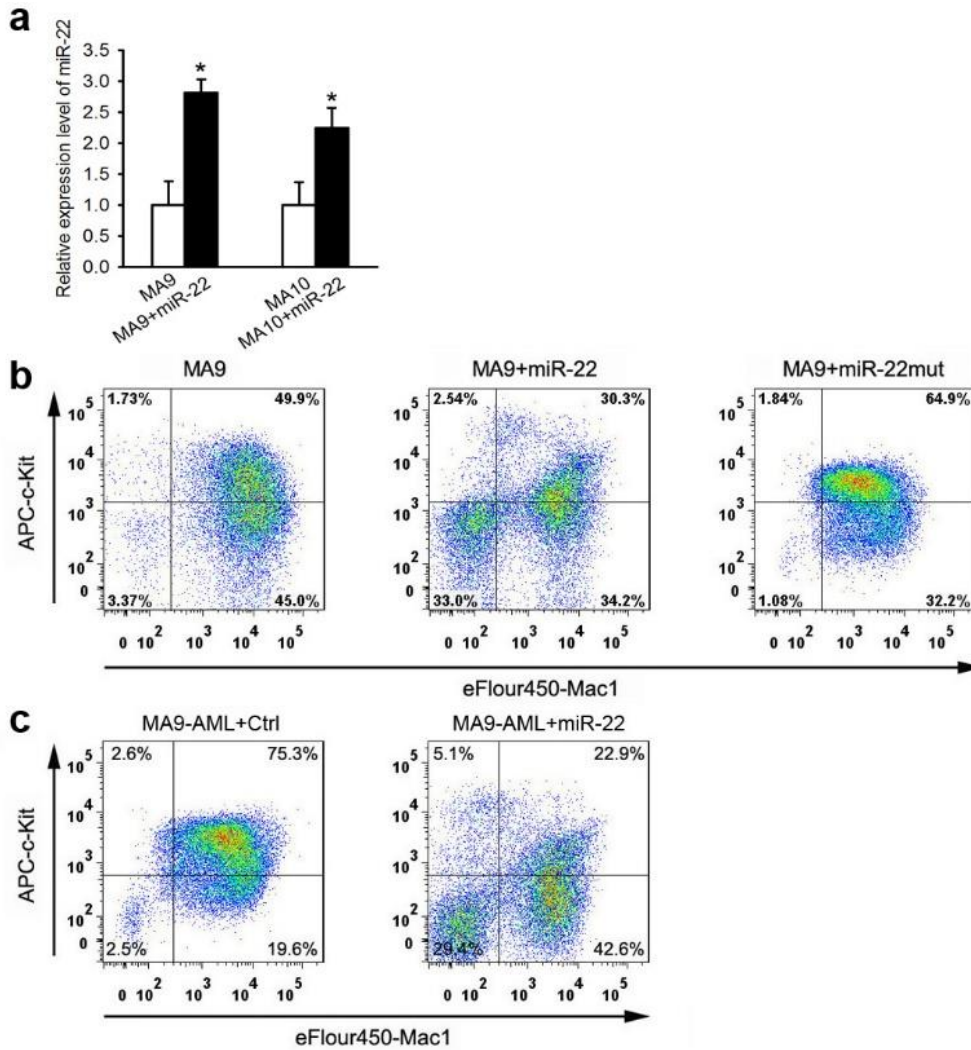

**Supplementary Figure 2.** Role of miR-22 in AML *in vivo*. **(a)** Overexpression level of miR-22 in bone marrow cells of MLL-AF9 and MLL-AF10-induced primary leukemic mice. 3~5 independent leukemic mice are included in each group. Mean±SD values are shown. \*,  $p < 0.05$ , *t*-test. **(b, c)** Flow cytometry analyses of the BM cells of both primary bone marrow transplantation (BMT) recipient mice **(b)** or secondary BMT recipient mice **(c)**. 0.5 million mouse BM cells collected at the end point were stained with APC-conjugated anti-mouse c-Kit or eFluor<sup>®</sup>450-conjugated anti-mouse CD11b (Mac-1) antibodies. Proportions of c-Kit<sup>+</sup> and/or Mac1<sup>+</sup> cells are shown.

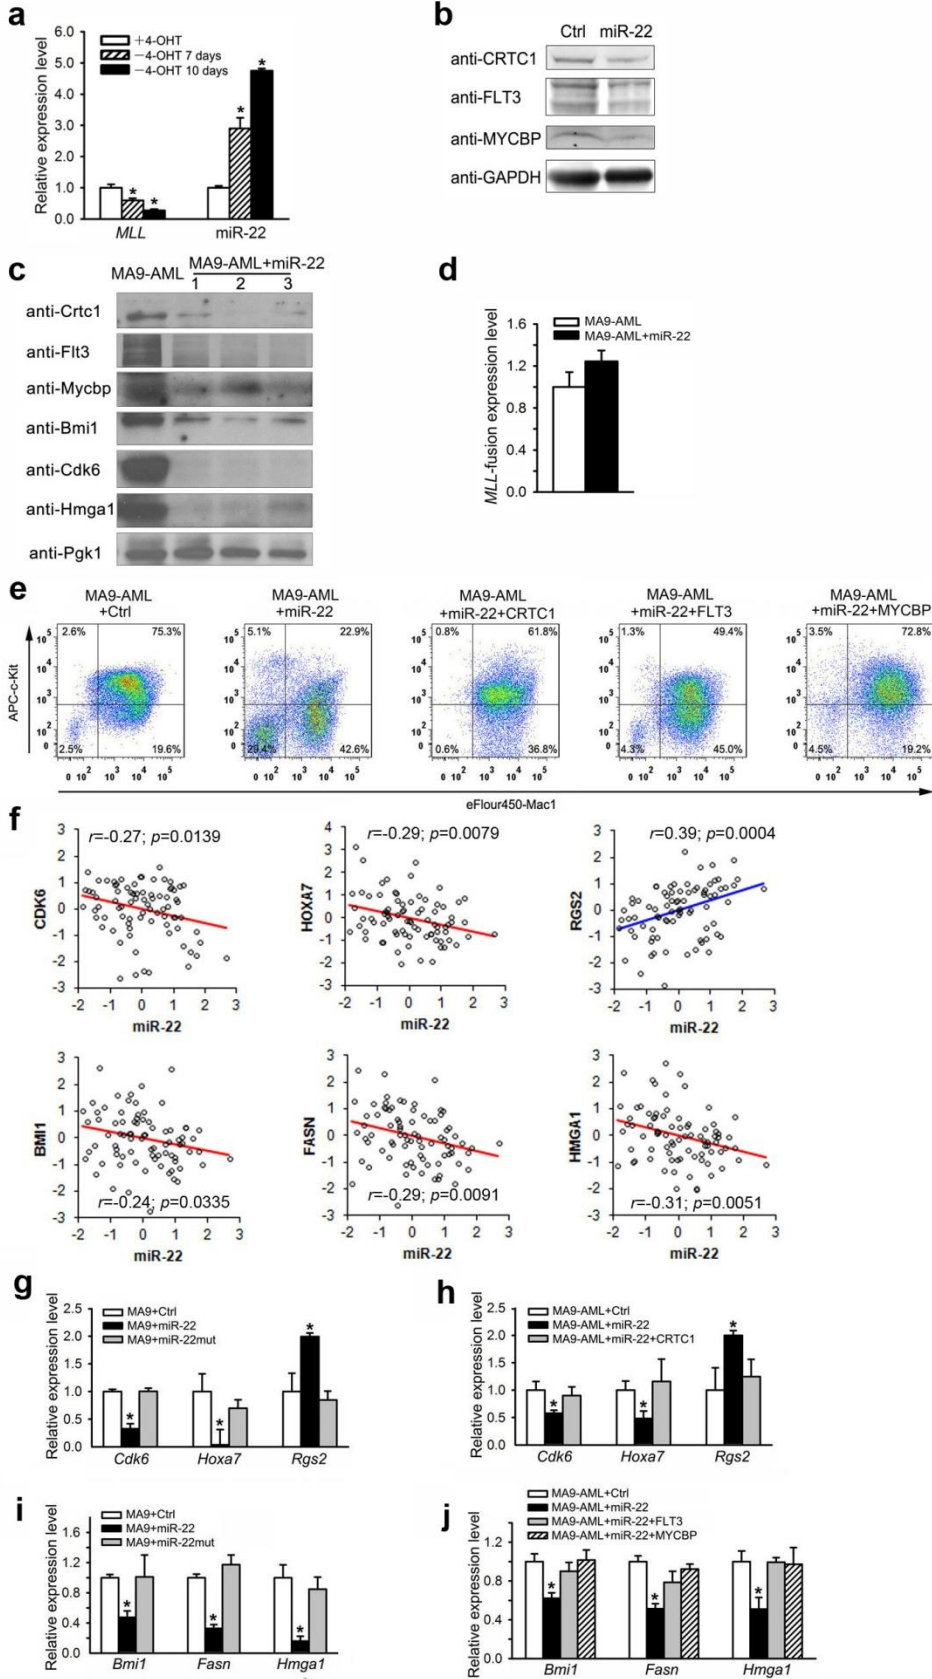

**Supplementary Figure 3.** Repression of the CREB and MYC pathways by miR-22. **(a)** Up-regulation of miR-22 level in *MLL-ENL-ERTm* cells after withdrawal of 4-OHT for 0, 7 or 10 days. **(b)** Down-regulation of CRTC1, FLT3 and MYCBP at the protein level by miR-22. MONOMAC-6 cells were transfected with MSCV-PIG-miR-22 (miR-22) or MSCV-PIG vector (Ctrl). Protein extractions of the cells were analyzed through Western-blotting assays 48 hrs post-transfection. **(c)** Down-regulation of *Crtc1*, *Flt3*, *Mycbp*, *Bmi1*, *Cdk6* and *Hmga1* by miR-22 overexpression. Protein levels in BM blast cells of leukemic mice transplanted with *MLL-AF9* or *MLL-AF9*+miR-22 primary leukemic cells are shown. **(d)** miR-22 overexpression showed no significant influence on the level of *MLL*-fusion in *MLL-AF9*-leukemic mouse BM cells. Mouse BM progenitor cells bearing *MLL-AF9* were retrovirally transduced with MSCV-PIG-miR-22 or MSCV-PIG vector. After 7 days' selection with puromycin, *MLL* levels were detected through qPCR. **(e)** Flow cytometry analyses of the BM cells of secondary BMT mice. 0.5 million mouse BM cells collected at the end point were stained with APC-conjugated anti-mouse c-Kit or eFluor<sup>®</sup>450-conjugated anti-mouse CD11b (Mac-1) antibodies. Proportions of c-Kit<sup>+</sup> and/or Mac1<sup>+</sup> cells are shown. **(f)** Correlation between the expression levels of miR-22 and *CDK6*, *HOXA7*, *RGS2*, *BMI1*, *FASN* or *HMGAI* in In-house\_81S. The correlation coefficient (*r*) and *p* values were detected by "Pearson Correlation", and the correlation regression lines were drawn with the "linear regression" algorithm. **(g-j)** Expression levels of the CREB downstream genes *Cdk6*, *Hoxa7* and *Rgs2*, as well as the MYC downstream genes *Bmi1*, *Fasn* and *Hmga1* were detected in the BM cells of the primary BMT recipient mice (**g, i**) or the secondary BMT recipients (**h, j**). The primary transplanted mice include *MLL-AF9*+Ctrl, *MLL-AF9*+miR-22, and *MLL-AF9*+miR-22 mutant (miR-22mut). The secondary recipients were transplanted with the blast cells of the primary *MLL-AF9* mice retrovirally transduced with MSCVneo+MSCV-PIG (MA9-AML+Ctrl), MSCVneo-miR-22+MSCV-PIG (MA9-AML+miR-22), or MSCVneo-miR-22+MSCV-PIG-*CRTC1/FLT3/MYCBP* (MA9-AML+miR-22+CRTC1/FLT3/MYCBP). n=5 for each group. Mean±SD values of three replicates are shown. \*, *p*<0.05. All the *p* values shown in this figure were generated by *t*-test, except for those shown in Figure 3F that were generated by Pearson correlation test.

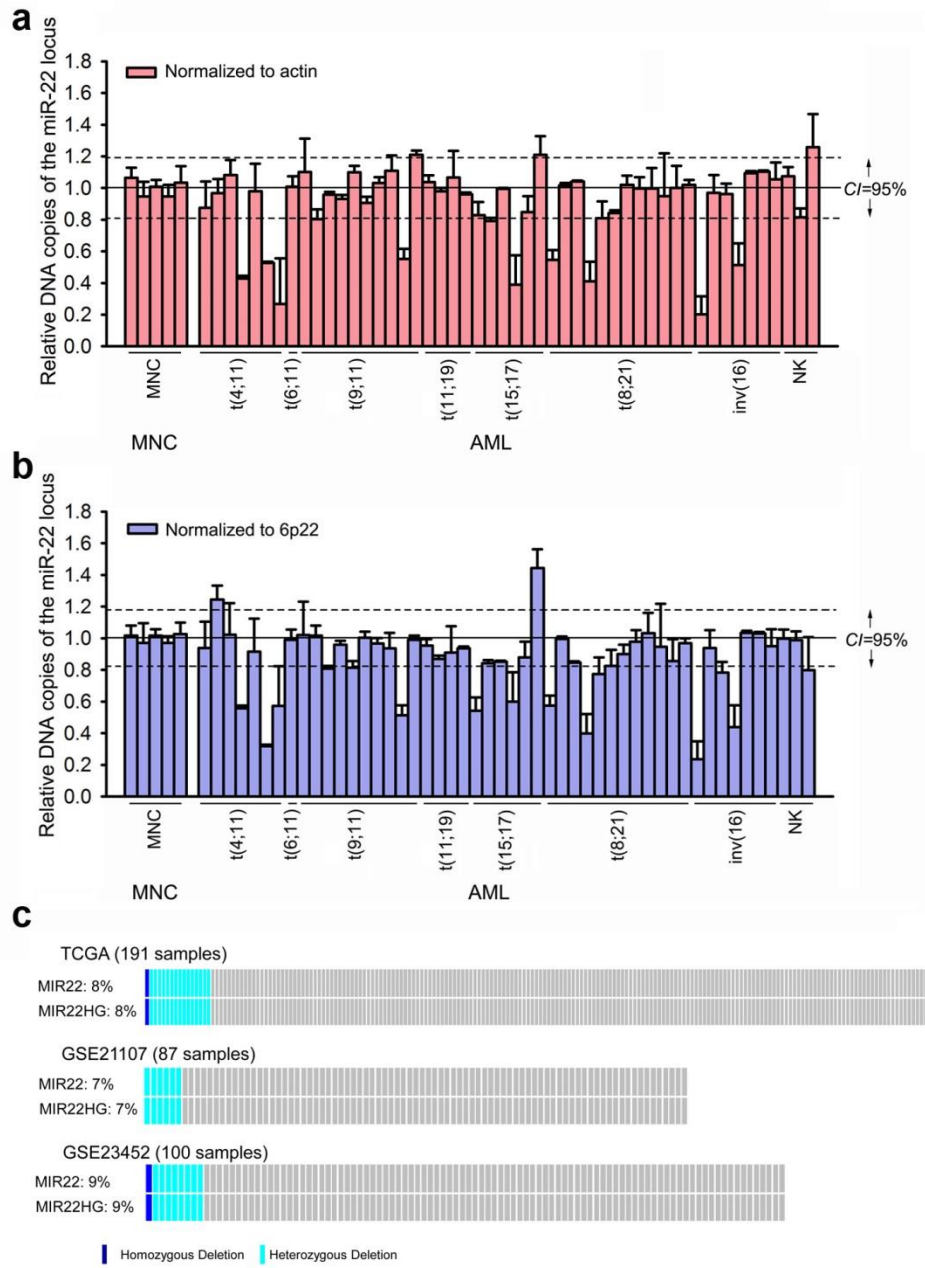

**Supplementary Figure 4.** DNA copy-number loss of the miR-22 gene locus in AML. **(a, b)** DNA copy number of the miR-22 gene locus of 50 AML samples and 5 normal controls were tested. qPCR data were normalized against the chromosomal region of *actin* **(a)** or *6p22* **(b)** probe. Mean values, standard deviations (error bars), and the 95% confidence interval (CI) are shown. **(c)** DNA copy-number loss of miR-22 in three independent AML datasets are shown. *Dark blue*: Homozygous deletion; *Cyan*: Heterozygous deletion.

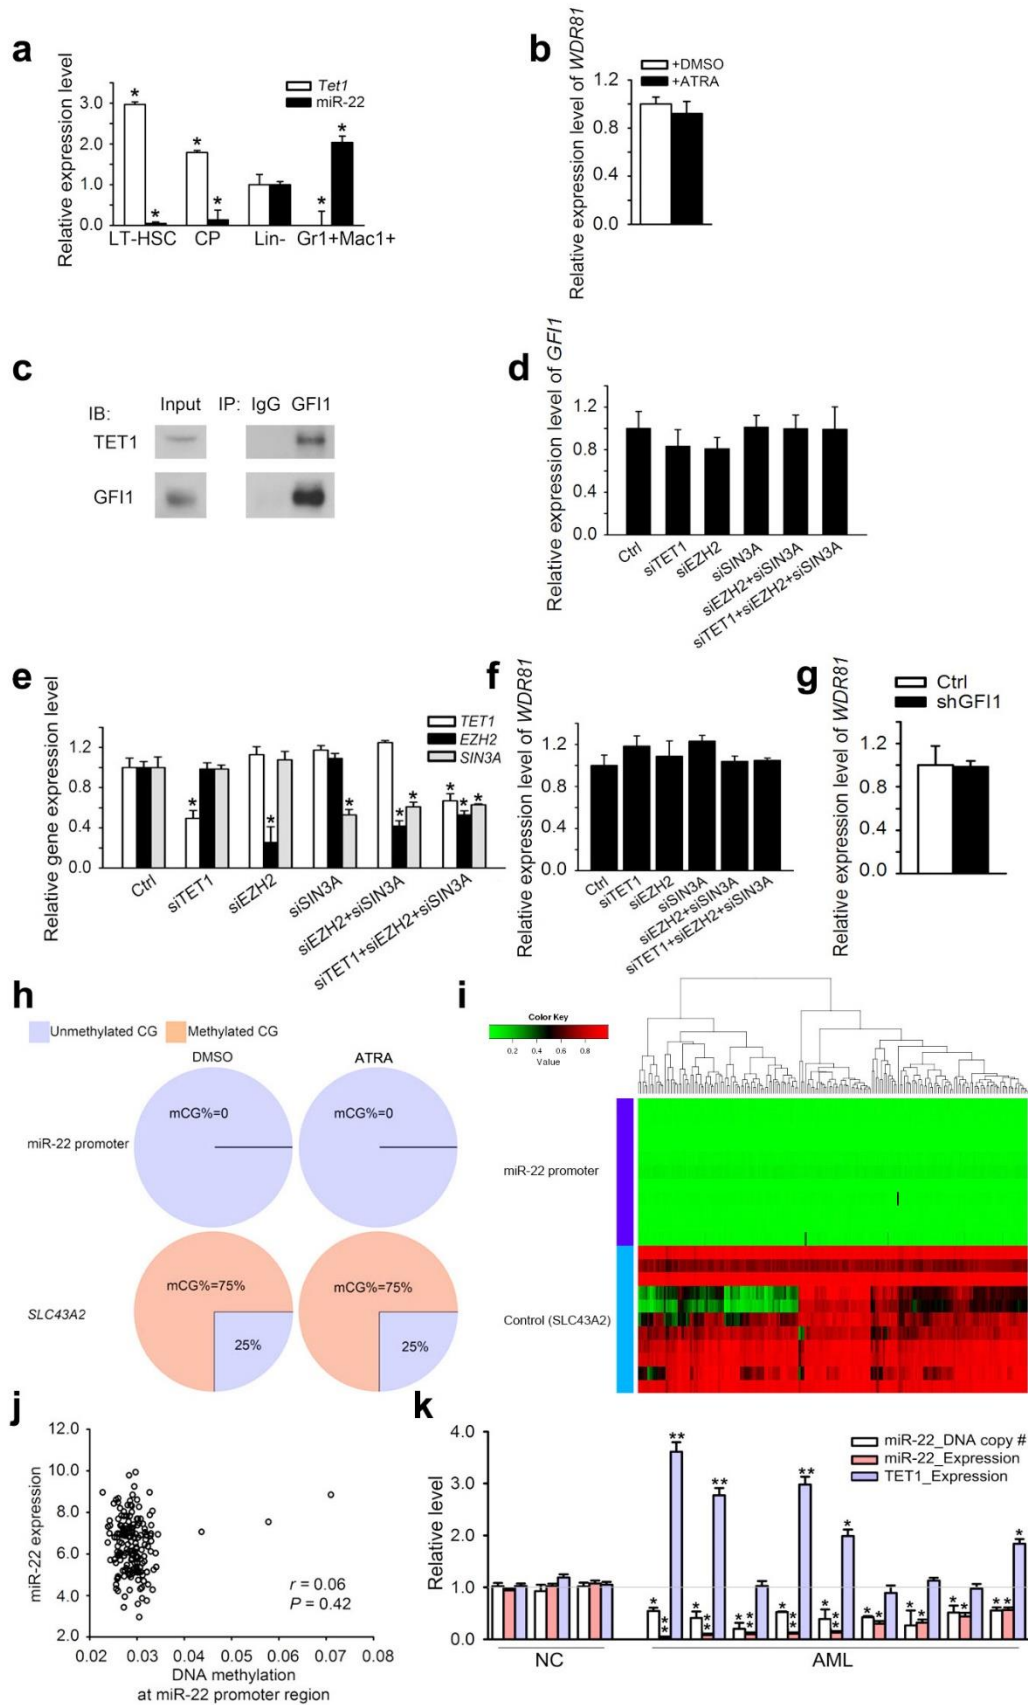

**Supplementary Figure 5.** Involvement of TET1 in miR-22 regulation. **(a)** Expression levels of Tet1 and miR-22 in various sub-populations of mouse normal hematopoietic cells. Gene expression levels in long-term HSC (LT-HSC; Lin<sup>-</sup>Sca1<sup>+</sup>c-Kit<sup>+</sup>Flk2<sup>-</sup>, LSKF<sup>-</sup>), committed progenitor (CP; Lin<sup>-</sup>Sca1<sup>-</sup>c-Kit<sup>+</sup>) and Gr-1<sup>+</sup>/Mac-1<sup>+</sup> myeloid cells, were normalized to the level in lineage negative (Lin<sup>-</sup>) cells. **(b)** Expression of *WDR81* in THP-1 cells 72 hours post-treatment with 1  $\mu$ M ATRA or DMSO control. **(c)** Co-immunoprecipitation showing the binding between GFII and TET1 in HEK293T cells. **(d)** Effects of knockdown of *TET1*, *EZH2* and/or *SIN3A* on *GFII* expression. **(e)** siRNA knockdown effects on *TET1*, *EZH2* and *SIN3A* in THP-1 cells. Gene levels were detected 48 hrs post-transfection. **(f)** Effects of knockdown of *TET1*, *EZH2* and/or *SIN3A* on *WDR81* expression. The expression level of *WDR81* was detected in THP-1 cells 72 hours post-transfection with siRNAs targeting *TET1*, *EZH2* and/or *SIN3A*. **(g)** Effects of knockdown of *GFII* on *WDR81* expression. The expression level of *WDR81* was detected in THP-1 cells transduced with lentiviral vectored *GFII* shRNA or control shRNA. **(h)** DNA methylation at miR-22 promoter region determined by bisulfite sequencing. Percentage of methylated CG (mCG%) at miR-22 promoter region in THP-1 cells treated with DMSO or 1  $\mu$ M ATRA for 72 hrs were analyzed, with *SLC43A2* (100 kbps downstream of miR-22 promoter) as a positive control of DNA methylation. **(i)** DNA methylation level at miR-22 promoter region of 194 AML patient samples from TCGA\_194S is shown, with *SLC43A2* as a positive control of DNA methylation. **(j)** Correlation analysis between miR-22 methylation and expression in 170 AML patient samples with both methylation and gene expression data from TCGA\_194S. **(k)** qPCR analysis of miR-22 and *TET1* expression in AML samples with DNA copy-number loss of miR-22. A total of 9 AML and 3 normal controls samples, all been studied in the analyses of Supplementary Figure 4a/b, are included. The expression levels of miR-22 and TET1 are normalized to *RNU48* and *actin*, respectively. The DNA copy numbers are normalized to those at the gene locus of *actin*. Mean $\pm$ SD values are shown. \*,  $p < 0.05$ ; \*\*,  $p < 0.01$ . All the  $p$  values shown in this figure were generated by  $t$ -test, except for the one shown in Figure 5J that was generated by Pearson correlation test.

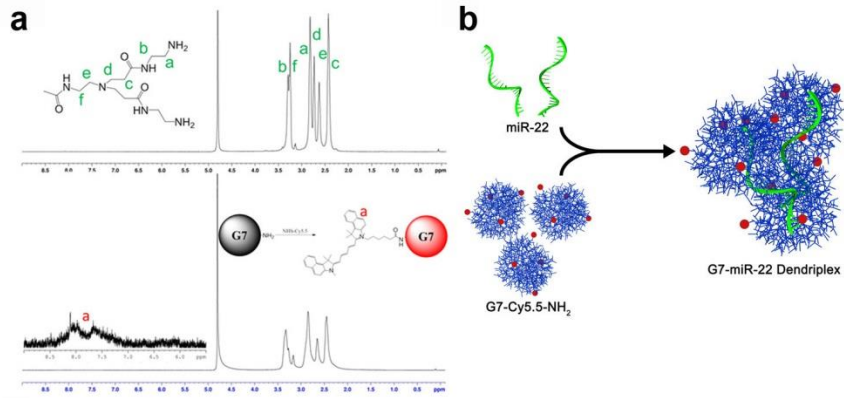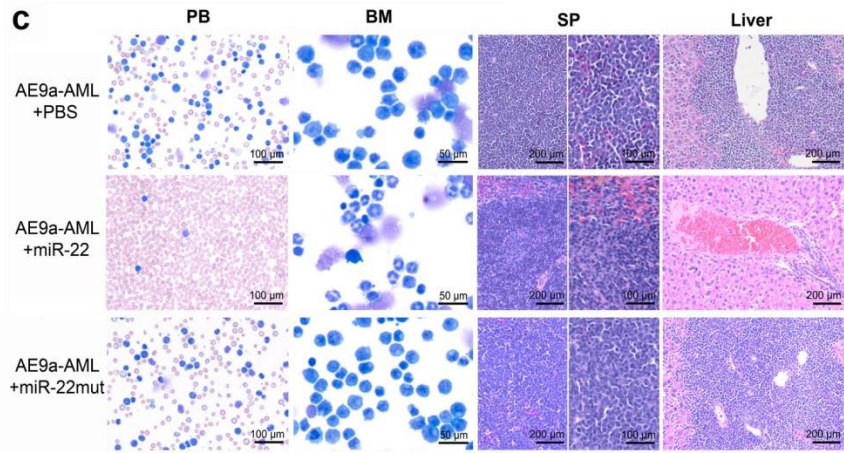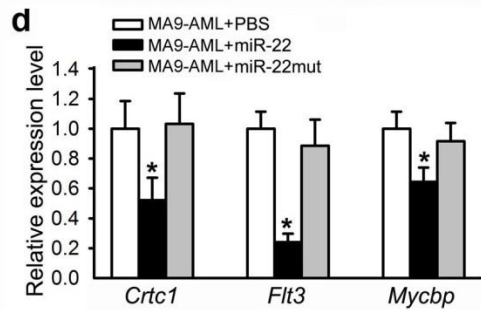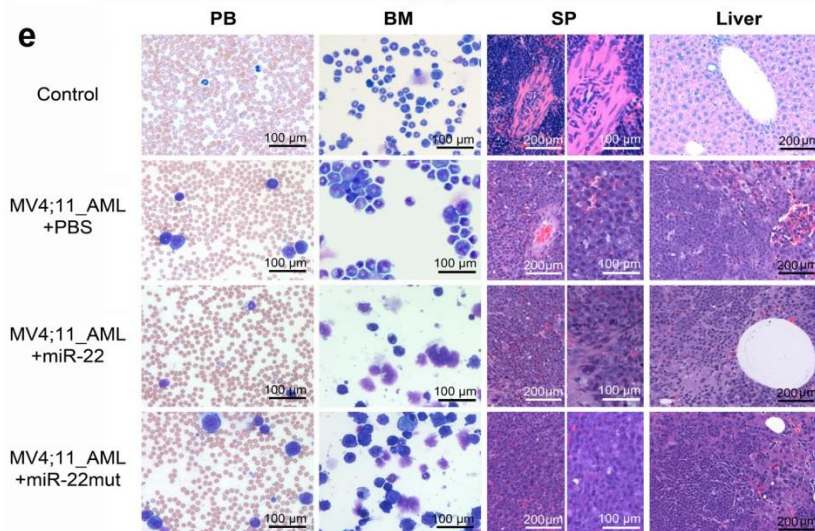



**Supplementary Figure 6.** The formation and effects of G7-Cy5.5-NH<sub>2</sub>-miR-22 nanoparticles. (a) <sup>1</sup>H NMR spectra of G7 PAMAM dendrimer (*upper panel*) and G7-Cy5.5-NH<sub>2</sub> (*lower panel*). Characteristic dendrimer peaks are located between 2.0–3.5 ppm. Following conjugation, there is an appearance of new peaks between 7.0-8.5 ppm due to the aromatic protons on Cy5.5, corresponding to approximately 4 Cy5.5 per G7. (b) Formation of the G7-miR-22 dendriplex. G7 PAMAM dendrimers were labeled using the near infrared dye, Cy5.5 (red dots), and mixed with miR-22. Complex formation is driven by electrostatic forces between the cationic primary amine surface groups of the PAMAM dendrimer and the anionic phosphate backbone of miR-22. Schematic represents approximate theoretical mixing ratio and sizes of polyplex components. (c) Wright-Giemsa stained PB and BM, and H&E stained spleen and liver of the *AE9a*-secondary leukemic mice treated with PBS control, miR-22 or miR-22 mutant nanoparticles. (d) Expression levels of *Crtc1*, *Flt3* and *Mycbp* in the BM cells of the PBS, miR-22- or miR-22 mutant-nanoparticle-treated secondary BMT recipient mice transplanted with *MLL-AF9* primary leukemic blast cells. Mean±SD values are shown. \*,  $p < 0.05$ , *t*-test. (e) Wright-Giemsa stained PB and BM, and H&E stained spleen and liver of the non-transplanted NSGS control or MV4;11 xenotransplanted NSGS leukemic mice treated with PBS control, miR-22 or miR-22 mutant nanoparticles.

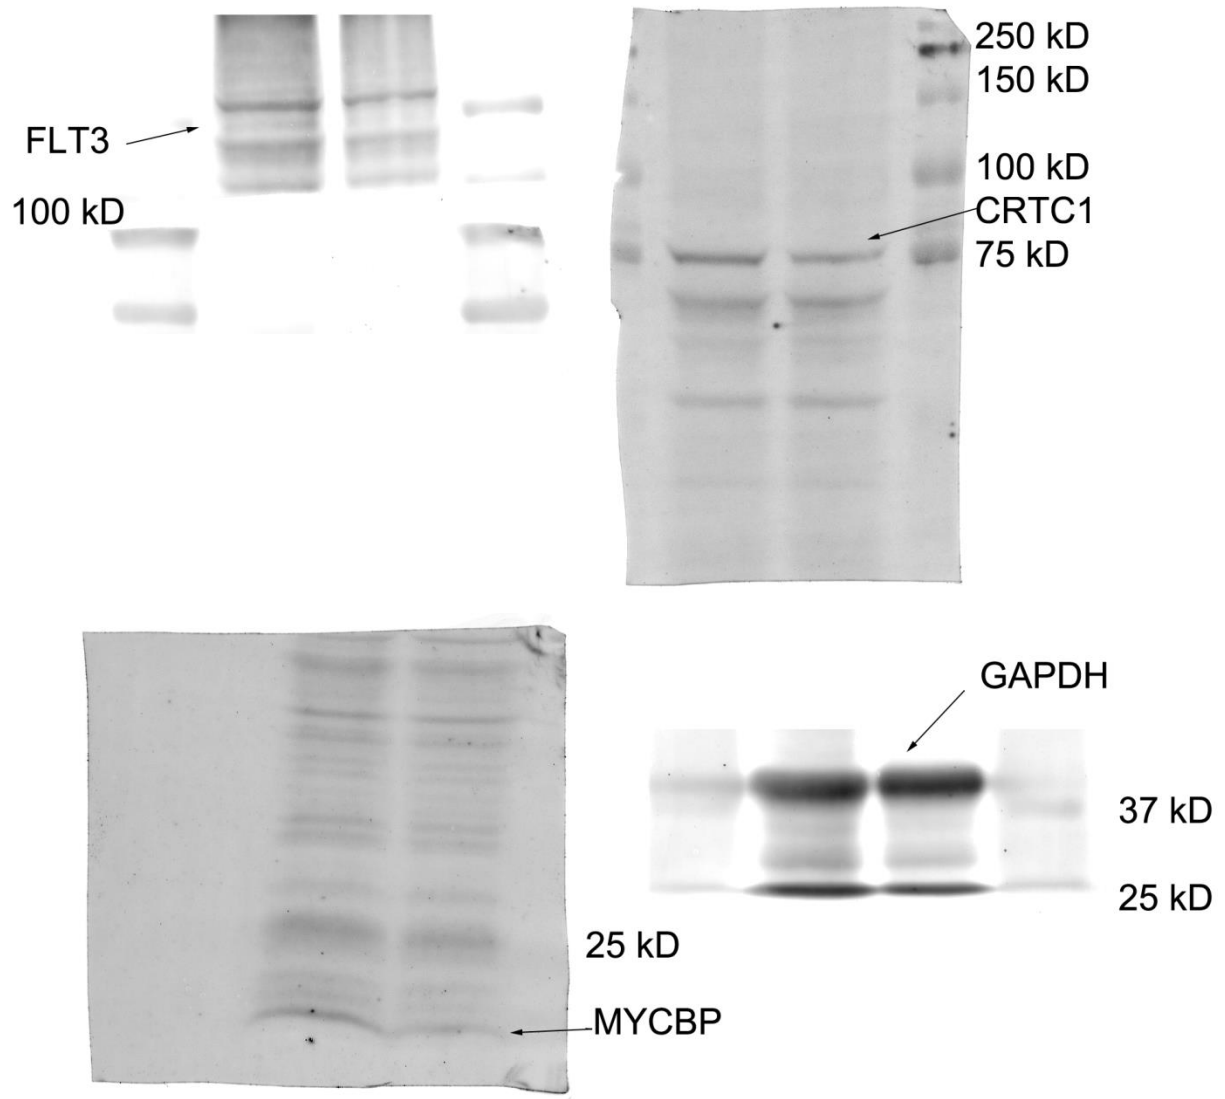

**Supplementary Figure 7. Original scans of Western blotting results shown as Supplementary Figure 3b.**

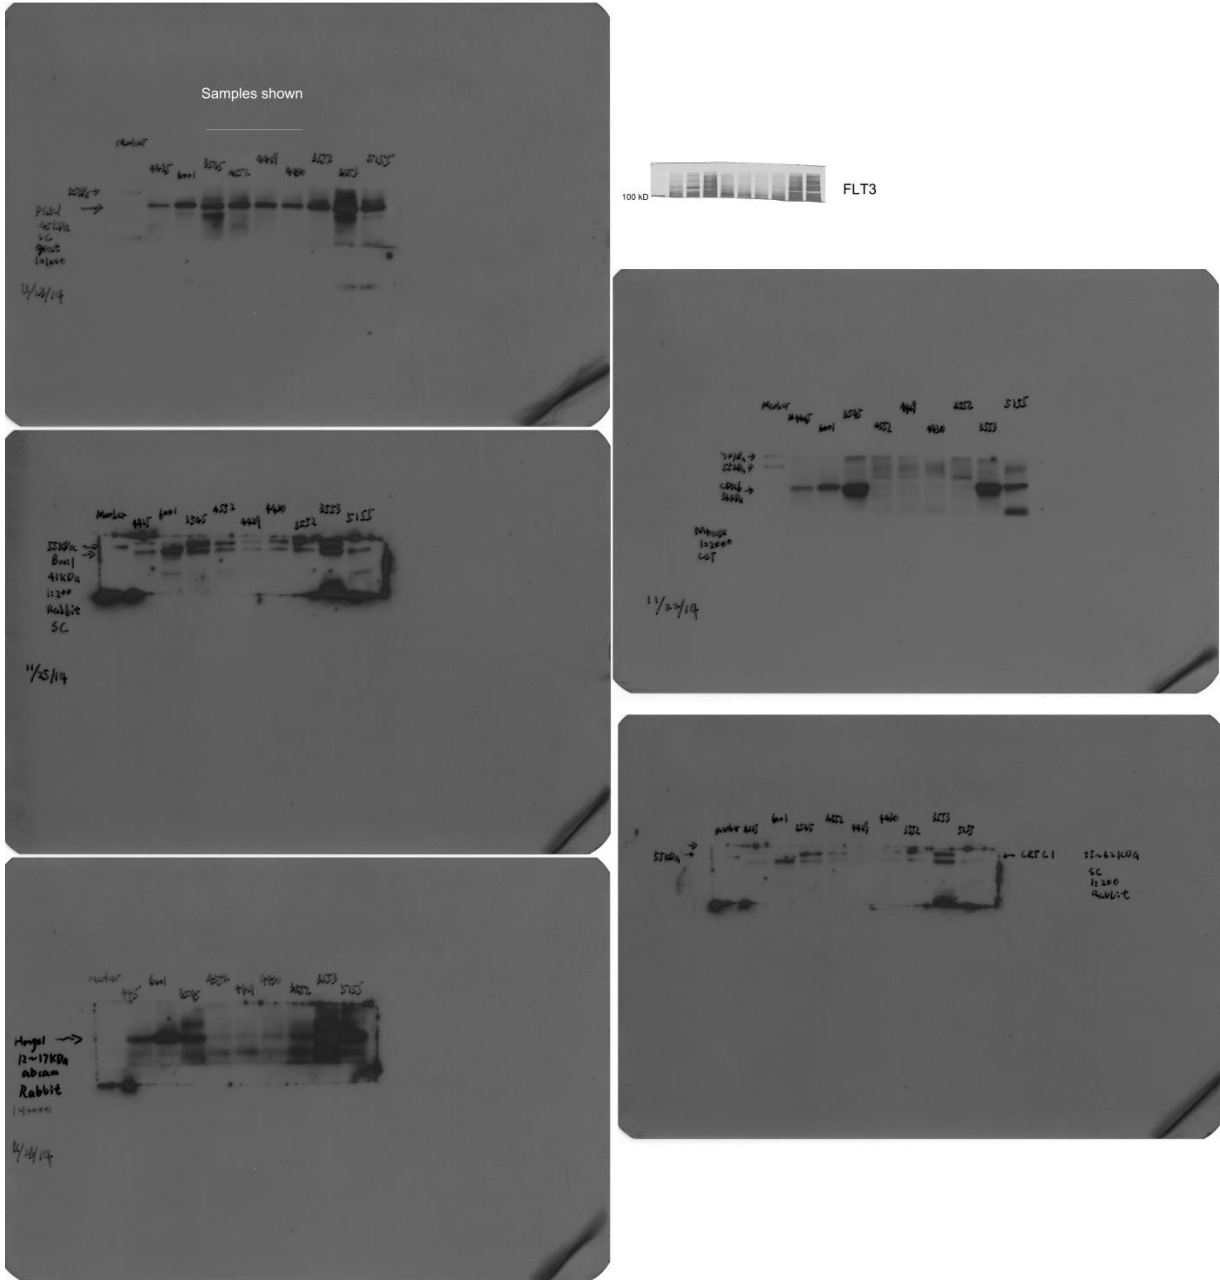

Supplementary Figure 8. Original scans of Western blotting results shown as Supplementary Figure 3c.

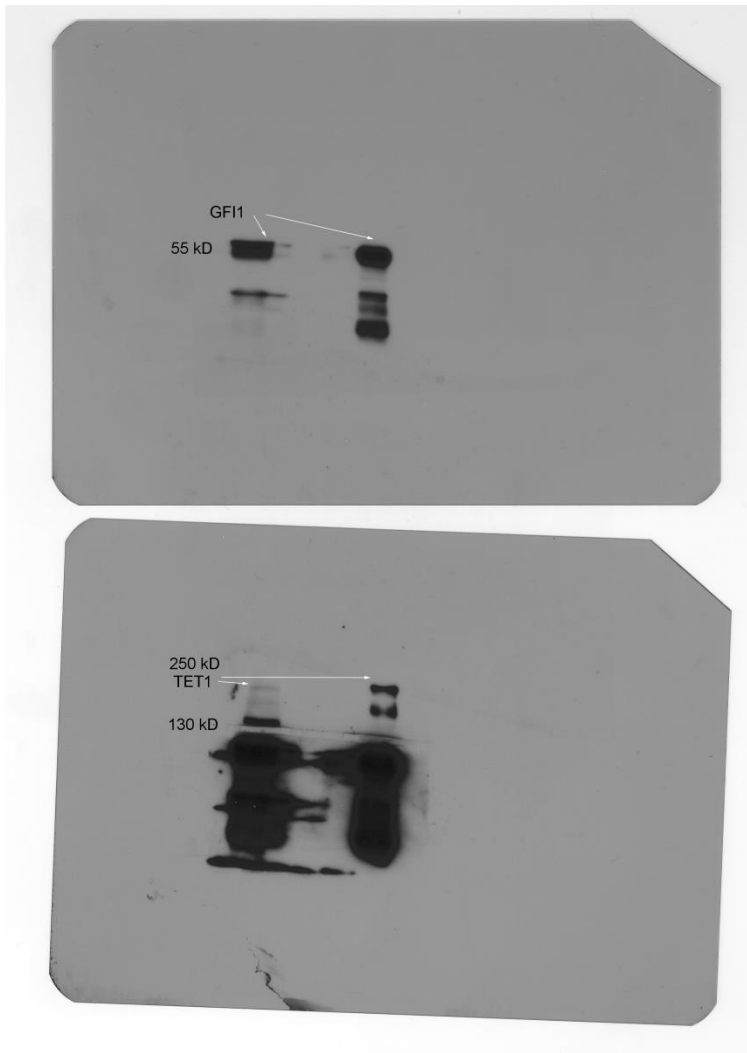

**Supplementary Figure 9. Original scans of Western blotting results shown as Figure 6c.**

**Supplementary Table 1. List of the 22 candidate target genes of miR-22 in AML**

| Gene           | In-house_81S<br>(Pearson correlation analysis of candidate targets and miR-22 in expression) |          | TCGA_177S<br>(Pearson correlation analysis of candidate targets and miR-22 in expression) |          | 15-mouse-sample set<br>(9 MLL-AF9 AML vs. 6 normal control samples; SAM) |                 | 109-human-sample set<br>(100 AML vs. 9 normal control samples; SAM) |                 |
|----------------|----------------------------------------------------------------------------------------------|----------|-------------------------------------------------------------------------------------------|----------|--------------------------------------------------------------------------|-----------------|---------------------------------------------------------------------|-----------------|
|                | <i>r</i>                                                                                     | <i>p</i> | <i>r</i>                                                                                  | <i>p</i> | Fold change                                                              | <i>q</i> -value | Fold change                                                         | <i>q</i> -value |
| <i>ANKRD28</i> | -0.43                                                                                        | 0.0001   | -0.34                                                                                     | <0.0001  | 1.72                                                                     | <0.0001         | 1.67                                                                | 0.0015          |
| <i>ANKRD52</i> | -0.22                                                                                        | 0.0458   | -0.17                                                                                     | 0.0199   | 1.22                                                                     | <0.0001         | 1.13                                                                | 0.0348          |
| <i>B3GNTL1</i> | -0.41                                                                                        | 0.0001   | -0.49                                                                                     | <0.0001  | 1.28                                                                     | <0.0001         | 1.34                                                                | 0.0107          |
| <i>CDK6</i>    | -0.27                                                                                        | 0.0139   | -0.34                                                                                     | <0.0001  | 2.38                                                                     | <0.0001         | 1.15                                                                | 0.0131          |
| <i>CRTC1</i>   | -0.31                                                                                        | 0.0045   | -0.16                                                                                     | 0.0359   | 1.32                                                                     | <0.0001         | 1.18                                                                | 0.0173          |
| <i>DDX51</i>   | -0.36                                                                                        | 0.0010   | -0.30                                                                                     | 0.0001   | 1.65                                                                     | <0.0001         | 1.18                                                                | 0.0112          |
| <i>DFFB</i>    | -0.26                                                                                        | 0.0185   | -0.19                                                                                     | 0.0103   | 1.35                                                                     | <0.0001         | 1.19                                                                | 0.0213          |
| <i>ETV6</i>    | -0.31                                                                                        | 0.0042   | -0.40                                                                                     | <0.0001  | 1.70                                                                     | <0.0001         | 1.53                                                                | 0.0044          |
| <i>FLT3</i>    | -0.21                                                                                        | 0.0307   | -0.35                                                                                     | <0.0001  | 4.48                                                                     | <0.0001         | 2.12                                                                | 0.0028          |
| <i>MBD3</i>    | -0.28                                                                                        | 0.0126   | -0.21                                                                                     | 0.0048   | 1.31                                                                     | <0.0001         | 1.15                                                                | 0.0238          |
| <i>METTL10</i> | -0.30                                                                                        | 0.0066   | -0.20                                                                                     | 0.0075   | 1.21                                                                     | 0.0053          | 1.32                                                                | 0.0091          |
| <i>MFSD10</i>  | -0.46                                                                                        | <0.0001  | -0.28                                                                                     | 0.0002   | 1.60                                                                     | <0.0001         | 1.61                                                                | 0.0036          |
| <i>MTL5</i>    | -0.29                                                                                        | 0.0081   | -0.29                                                                                     | 0.0001   | 1.50                                                                     | <0.0001         | 1.17                                                                | 0.0407          |
| <i>MYCBP</i>   | NA                                                                                           | NA       | -0.15                                                                                     | 0.0481   | 1.11                                                                     | 0.034           | NA                                                                  | NA              |
| <i>OLA1</i>    | -0.31                                                                                        | 0.0048   | -0.35                                                                                     | <0.0001  | 1.37                                                                     | <0.0001         | 1.10                                                                | 0.0446          |
| <i>RCC2</i>    | -0.24                                                                                        | 0.0323   | -0.23                                                                                     | 0.0026   | 1.37                                                                     | 0.0002          | 1.33                                                                | 0.0041          |
| <i>SGTA</i>    | -0.34                                                                                        | 0.0019   | -0.20                                                                                     | 0.0082   | 1.13                                                                     | 0.0014          | 1.53                                                                | <0.0001         |
| <i>SPATS2</i>  | -0.33                                                                                        | 0.0024   | -0.30                                                                                     | 0.0001   | 1.05                                                                     | 0.052           | 1.21                                                                | 0.0152          |
| <i>TRIM13</i>  | -0.23                                                                                        | 0.0392   | -0.31                                                                                     | <0.0001  | 2.58                                                                     | <0.0001         | 1.46                                                                | 0.0016          |
| <i>TRIM46</i>  | -0.23                                                                                        | 0.0387   | -0.26                                                                                     | 0.0006   | 1.25                                                                     | <0.0001         | 1.27                                                                | 0.0054          |

|                |       |        |       |         |      |         |      |        |
|----------------|-------|--------|-------|---------|------|---------|------|--------|
| <i>ZCCHC3</i>  | -0.26 | 0.0187 | -0.28 | 0.0001  | 1.63 | 0.0002  | 1.13 | 0.026  |
| <i>ZNF512B</i> | -0.39 | 0.0003 | -0.42 | <0.0001 | 2.03 | <0.0001 | 1.38 | 0.0019 |

Note: *r*, correlation coefficient; *p*, *p*-value; NA, not available. SAM, significant analysis of microarrays<sup>1</sup>. Notably, *MYCBP* was not included in Affymetrix GeneChip® Human Exon ST Arrays and thus it was absent in our in-house human AML datasets<sup>2,3</sup>; as a result, *MYCBP* was not shown in the original 21 candidate target gene list, although *MYCBP* exhibited a significant inverse correlation in expression with miR-22 in the TCGA dataset and was significantly up-regulated in the mouse AML dataset.

**Supplementary Table 2. List of functionally important downstream target genes of the CREB or MYC signaling pathways that exhibit a significant inverse correlation of expression with miR-22 in AML**

| Signaling Pathway | Gene         | In-house_81S (Pearson correlation analysis of candidate genes and miR-22 in expression) |          | TCGA_177S (Pearson correlation analysis of candidate genes and miR-22 in expression) |          |
|-------------------|--------------|-----------------------------------------------------------------------------------------|----------|--------------------------------------------------------------------------------------|----------|
|                   |              | <i>r</i>                                                                                | <i>p</i> | <i>r</i>                                                                             | <i>p</i> |
| CREB              | <i>CDK6</i>  | -0.27                                                                                   | 0.0139   | -0.34                                                                                | <0.0001  |
|                   | <i>HOXA7</i> | -0.29                                                                                   | 0.0079   | -0.16                                                                                | 0.0345   |
|                   | <i>RGS2</i>  | 0.39                                                                                    | 0.0004   | 0.50                                                                                 | <0.0001  |
| MYC               | <i>BMII</i>  | -0.24                                                                                   | 0.0335   | -0.12                                                                                | 0.0455   |
|                   | <i>FASN</i>  | -0.29                                                                                   | 0.0091   | -0.26                                                                                | 0.0004   |
|                   | <i>HMGAI</i> | -0.31                                                                                   | 0.0051   | -0.18                                                                                | 0.0145   |

Note: *r*, correlation coefficient; *p*, *p*-value.

**Supplementary Table 3. Correlation between miR-22 and *TET1/2/3* or *GFII* in expression in three AML patient cohorts\***

| AML set               | Gene        | <i>r</i>      | <i>p</i> |
|-----------------------|-------------|---------------|----------|
| In-house_81S (n=81)   | <i>TET1</i> | <b>-0.328</b> | 0.0014   |
|                       | <i>TET2</i> | <b>0.239</b>  | 0.016    |
|                       | <i>TET3</i> | <b>0.013</b>  | 0.45     |
|                       | <i>GFII</i> | <b>-0.429</b> | <0.0001  |
| TCGA_183S (n=183)     | <i>TET1</i> | <b>-0.380</b> | <0.0001  |
|                       | <i>TET2</i> | <b>0.356</b>  | <0.0001  |
|                       | <i>TET3</i> | <b>0.327</b>  | <0.0001  |
|                       | <i>GFII</i> | <b>-0.249</b> | 0.0007   |
| GSE37642_562S (n=562) | <i>TET1</i> | <b>-0.395</b> | <0.0001  |
|                       | <i>TET2</i> | <b>0.140</b>  | 0.0009   |
|                       | <i>TET3</i> | <b>0.294</b>  | <0.0001  |
|                       | <i>GFII</i> | <b>-0.262</b> | 0.0005   |

\*Pearson Correlation analysis of *TET1/2/3* or *GFII* with mature miR-22 (for In-house\_81S) or precursor miR-22 (for TCGA\_183S and GSE37642\_562S) in expression was performed. *r*, correlation coefficient; *p*, *p*-value.



**Supplementary Table 4. Effects of G7-miR-22-nanoparticles on mouse blood cell differentiation.**

|                                  | 4 W   |        | 8 W   |        | 12 W |        | 16 W  |        | 20 W |        | Normal range |
|----------------------------------|-------|--------|-------|--------|------|--------|-------|--------|------|--------|--------------|
|                                  | PBS   | miR-22 | PBS   | miR-22 | PBS  | miR-22 | PBS   | miR-22 | PBS  | miR-22 |              |
| <b>WBC (K/<math>\mu</math>l)</b> | 12.26 | 11.92  | 12.06 | 8.92   | 4.14 | 4.18   | 8.71  | 9.18   | 5.74 | 6.7    | 1.8-10.7     |
| <b>NE (K/<math>\mu</math>l)</b>  | 2.79  | 2.04   | 2.33  | 1.85   | 0.57 | 0.06   | 1.16  | 0.61   | 0.68 | 0.88   | 0.1-2.4      |
| <b>LY (K/<math>\mu</math>l)</b>  | 8.3   | 9.48   | 8.87  | 6.59   | 3.38 | 3.97   | 6.95  | 7.97   | 4.67 | 5.24   | 0.9-9.3      |
| <b>MO (K/<math>\mu</math>l)</b>  | 0.43  | 0.3    | 0.5   | 0.46   | 0.12 | 0.14   | 0.36  | 0.29   | 0.33 | 0.44   | 0.0-0.4      |
| <b>EO (K/<math>\mu</math>l)</b>  | 0.57  | 0.08   | 0.25  | 0.02   | 0.05 | 0      | 0.19  | 0.23   | 0.05 | 0.1    | 0.0-0.2      |
| <b>BA (K/<math>\mu</math>l)</b>  | 0.16  | 0.01   | 0.11  | 0.01   | 0.01 | 0      | 0.06  | 0.09   | 0.01 | 0.03   | 0.0-0.2      |
| <b>RBC (M/<math>\mu</math>l)</b> | 11.68 | 10.74  | 12.2  | 10.57  | 9.41 | 11.78  | 11.51 | 12.35  | 7.71 | 9.41   | 6.36-9.42    |
| <b>PLT (K/<math>\mu</math>l)</b> | 728   | 875    | 847   | 1215   | 1253 | 1246   | 1007  | 1354   | 1070 | 873    | 592-2972     |

Note: Shown are data collected at the indicated time points (i.e. 4, 8, 12, 16 and 20 weeks) post single *i.v.* injection of 0.5 mg/kg of G7-miR-22-nanoparticles (miR-22) or PBS control (PBS). WBC = white blood cells; NE = neutrophils; LY = lymphocytes; MO = monocytes; EO = eosinophils; BA = basophils; RBC = red blood cells; PLT = platelets.

## SUPPLEMENTARY REFERENCES

1. Tusher, V.G., Tibshirani, R. & Chu, G. Significance analysis of microarrays applied to the ionizing radiation response. *Proc Natl Acad Sci USA* **98**, 5116-5121 (2001).
2. He, C., *et al.* Young intragenic miRNAs are less coexpressed with host genes than old ones: implications of miRNA-host gene coevolution. *Nucleic Acids Res* **40**, 4002-4012 (2012).
3. Huang, H., *et al.* TET1 plays an essential oncogenic role in MLL-rearranged leukemia. *Proc Natl Acad Sci U S A* **110**, 11994-11999 (2013).
